# Supplementary material for: Base-pair resolution detection of transcription factor binding site by deep deconvolutional network
Source: Oxford University Press journal article supplement (doi:10.1093/bioinformatics/bty383), 2018-05-03
Supplement: bioinformatics_34_20_3446_s9.doc [file bioinformatics_34_20_3446_s9.doc]

**S1. Performance Evaluation Scheme**

IoU is very popular in the field of pixel-level image segmentation since it discerns a proposed solution with respect to the ground truth in perceptually meaningful way. Precision (P) quantifies the correctness of a system i.e., the capacity to predict known binding sites accurately (true positives) while decreasing the number of wrongly predicted binding sites (false positives). Recall (R) measures the entirety, i.e., the ability of an algorithm to detect binding sites properly while minimizing the number of known binding sites that are erroneously missed (false negatives). Finally, F-Score (F), the harmonic mean of precision and recall, were calculated to have a measure of both methods’ efficiency in discovering putative TFBS. Mathematical definitions of these metrics are as follows:

IoU = TP / (TP + FN + FP)

Precision (P) = TP / (TP + FP)

Recall (R) = TP / (TP + FN)

F-Score = 2*P*R / (P + R)

**S2. Performance comparison of DeepSNR and MATCH**

To validate whether DeepSNR is more efficient than MATCH or not, we applied the open source version of MATCH on GR (predictions of CTCF and AR are not available in the open source version) and depicted the results in Fig. S1(b). Evidently, MATCH and MatInspector performed very similarly although the median scores of MatInspector are slightly higher than MATCH. This result in unsurprising since both the methods utilize matrix similarity scores to detect TFBS as pointed out in (Kel et al., 2003). It is clear from Table S2 and Fig S1 that DeepSNR outperforms the two algorithms by a significant margin in predicting the location of TFBS.

**S3. Discovering the Most Significant Nucleotide**

DeepBind’s mutation map scheme was deployed to evaluate the significance of each nucleotide on TF binding. Briefly, we mutated each nucleotide in a sequence with every possible point mutation and measured the change in affinity score for each mutation with respect to the affinity score of unaltered sequence using DeepBind. The average change in binding scores were evaluated for each base-pair and the nucleotide having the maximum average change in binding affinity was deemed to be the most important for TF binding.

**S4. Applying DeepBind and DeepSNR concurrently on ChIP-seq data**

The DeepSNR model for CTCF transcription factor was trained using 100 bp long DNA sequences from ChIP-exo data of HeLa cell line. Therefore, to apply trained DeepSNR model on 400 bp wide ChIP-seq binding region, we divided the entire region into 5 bins of 100 bp each using a sliding window of 75 bp. Next, we fed each bin into DeepBind to determine the presence of putative binding site in the input sequence. If DeepBind confirms TF-DNA binding in a bin then we applied DeepSNR to predict the binding location in that bin. In case of DeepBind predicting no binding, we moved to the next bin to repeat the same process and finally the binary outcome through DeepSNR for all the bins were combined as OR operation to achieve the base pair resolution prediction result of whole ChIP-seq binding region. DeepSNR was employed in conjunction with DeepBind because DeepSNR is trained such that its input sequence is known to contain a binding site. Therefore, applying DeepSNR on a sequence that doesn’t contain binding site may lead to erroneous result.

**Supplementary Tables and Figures**

Table S1. Information of dataset used for predicting binding location of Androgen Receptor (AR) and Glucocorticoid Receptor (GR)

| **TF name** | **Total no of samples**  **(training,validation,testing)** | **Binding length** | **Input sequence length** | **Source** |
| --- | --- | --- | --- | --- |
| Androgen receptor (AR) | 402472 (272472, 30000, 100000) | 58 bp | 100 bp | GSE43785 |
| Glucocorticoid receptor (GR) | 28865 (22865, 1000, 5000) | 79 bp | 200 bp | GSE79432 |

**Table S2. Performances of DeepSNR, MatInspector and MATCH** in predicting AR and GR binding sites

| **TF name** | **Method** | **Median precision** | **Median recall** | **Median F1-score** | **Median IoU** |
| --- | --- | --- | --- | --- | --- |
| AR | DeepSNR | 0.871 | 0.931 | 0.9 | 0.812 |
| MatInspector | 0.894 | 0.327 | 0.493 | 0.327 |
| GR | DeepSNR | 0.507 | 1.0 | 0.669 | 0.503 |
| MatInspector | 0.428 | 0.187 | 0.265 | 0.172 |
| MATCH | 0.38 | 0.16 | 0.2 | 0.16 |


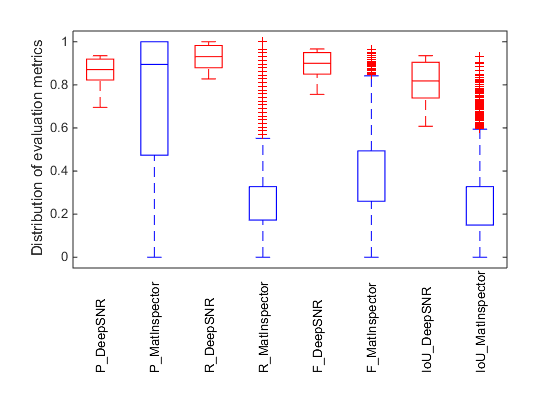


(a)


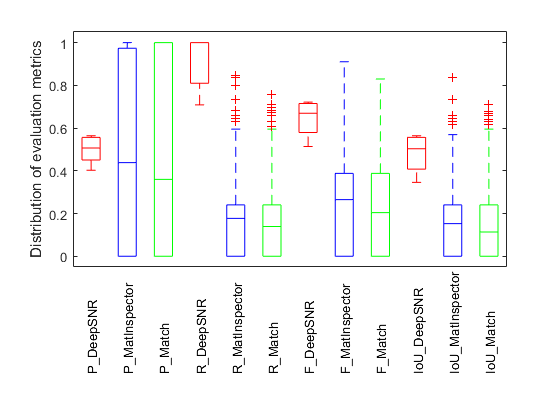


(b)

Figure S1. Similar to CTCF transcription factor, DeepSNR has shown better performance than MatInspector/MATCH in predicting binding locations of (a) AR and (b) GR transcription factors.


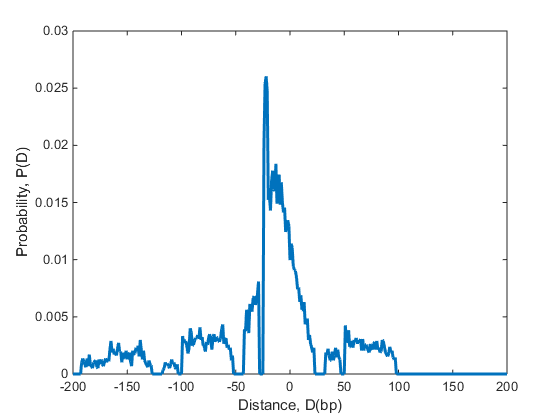


Figure S2. Probability distribution of distance between CTCF motif (determined by DeepSNR) and ChIP-seq peak centre

**References**

Kel, A. E., Gößling, E., Reuter, I., Cheremushkin, E., Kel-Margoulis, O. V., & Wingender, E. (2003). MATCHTM: a tool for searching transcription factor binding sites in DNA sequences*. Nucleic acids research,* 31(13), 3576-3579.
